# Supplementary material for: Polyphenol Extract from “Greco” Grape Canes: Characterization, Antioxidant Capacity, and Antitumor Effects on Cal-33 and JHU-SCC-011 Head and Neck Squamous Cell Carcinoma
Source: MDPI journal article supplement (doi:10.3390/molecules27082576), 2022-04-15
Supplement: s1 [file s1]

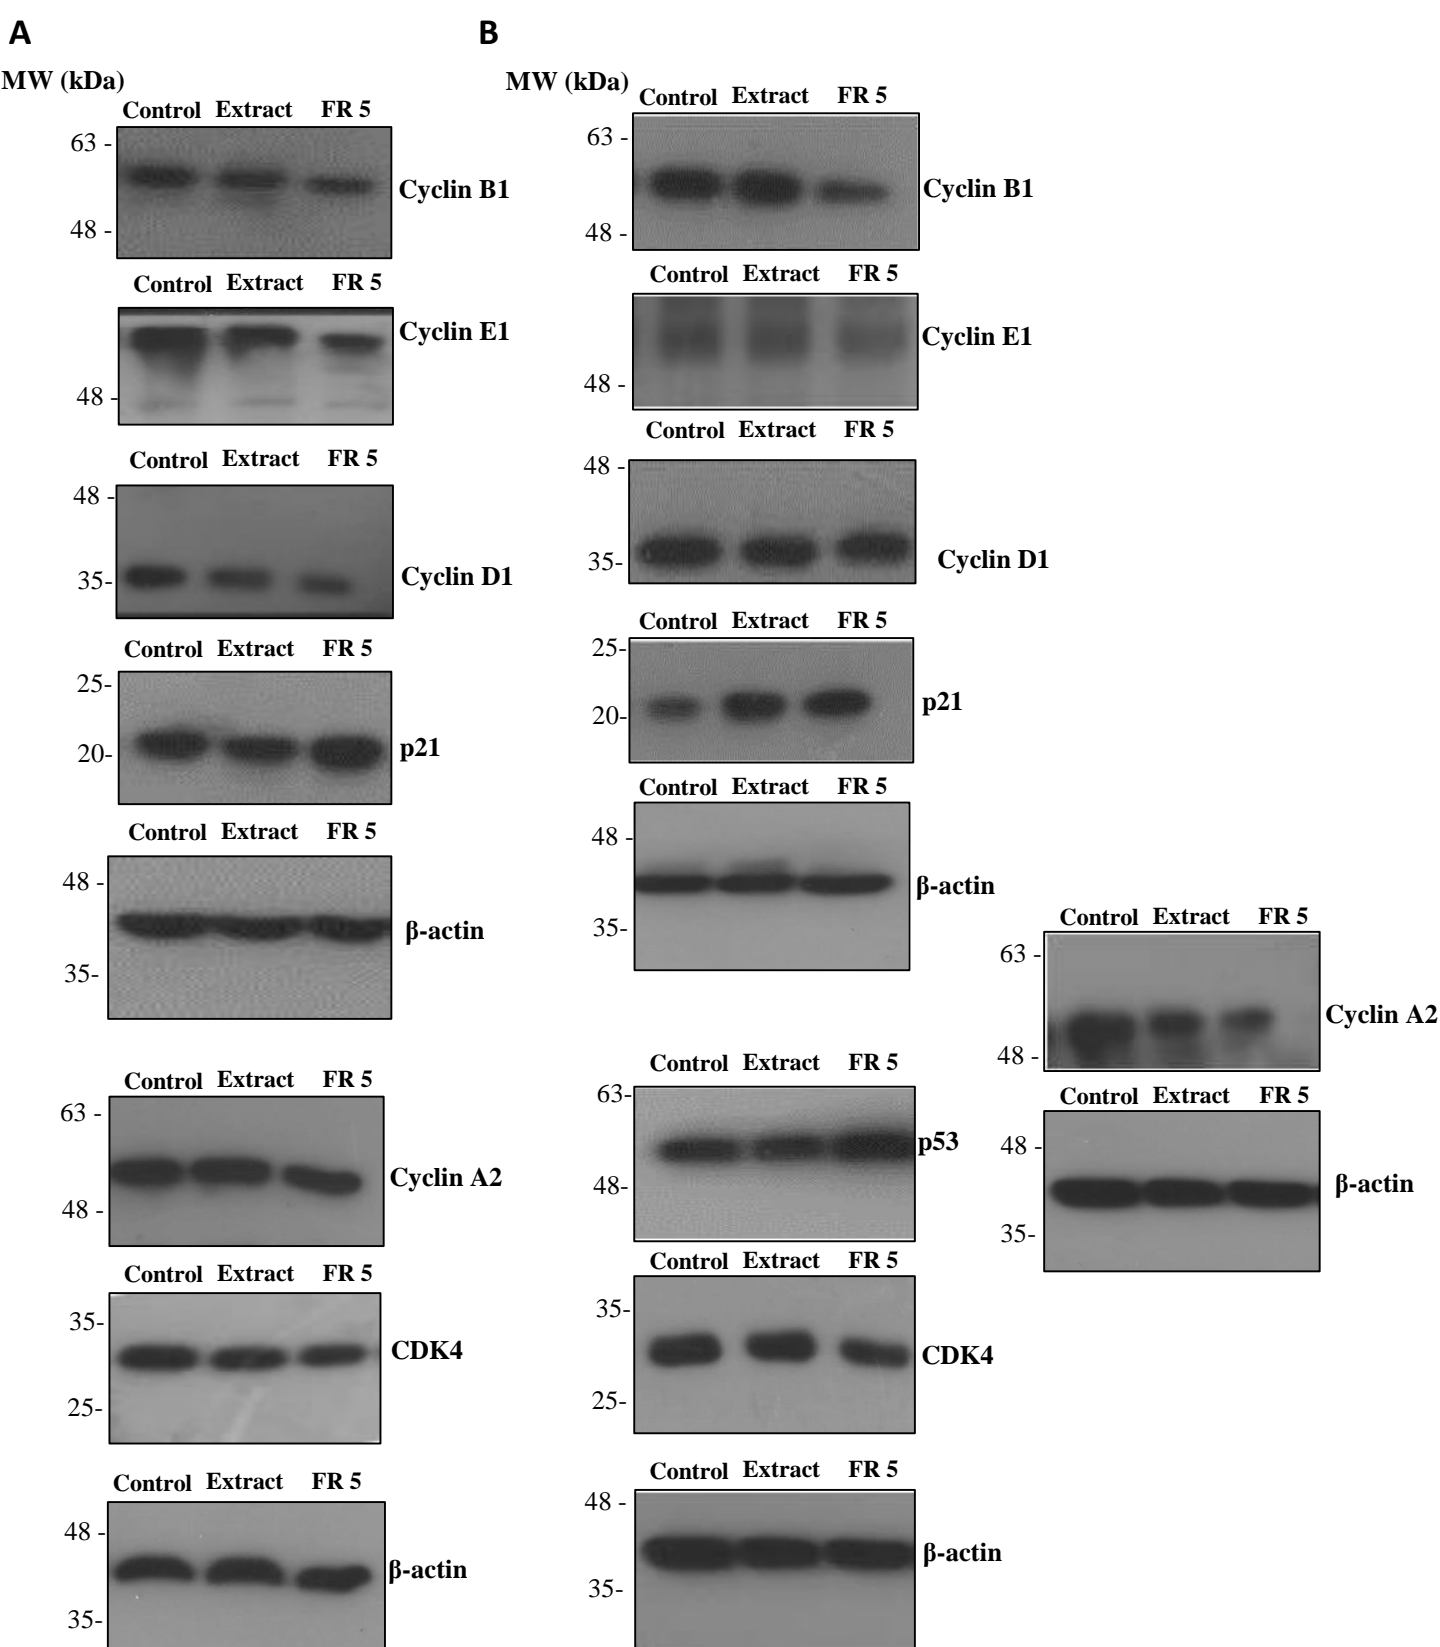

**Figure S1.** Effect of grape canes extract obtained at pH 7 for 60 min, and its polyphenol-rich FR 5 on cell cycle of Cal-33 (A) and JHU-SCC-011 (B) cells. The cropped blots are used in the main figure (Figure 6).

**A**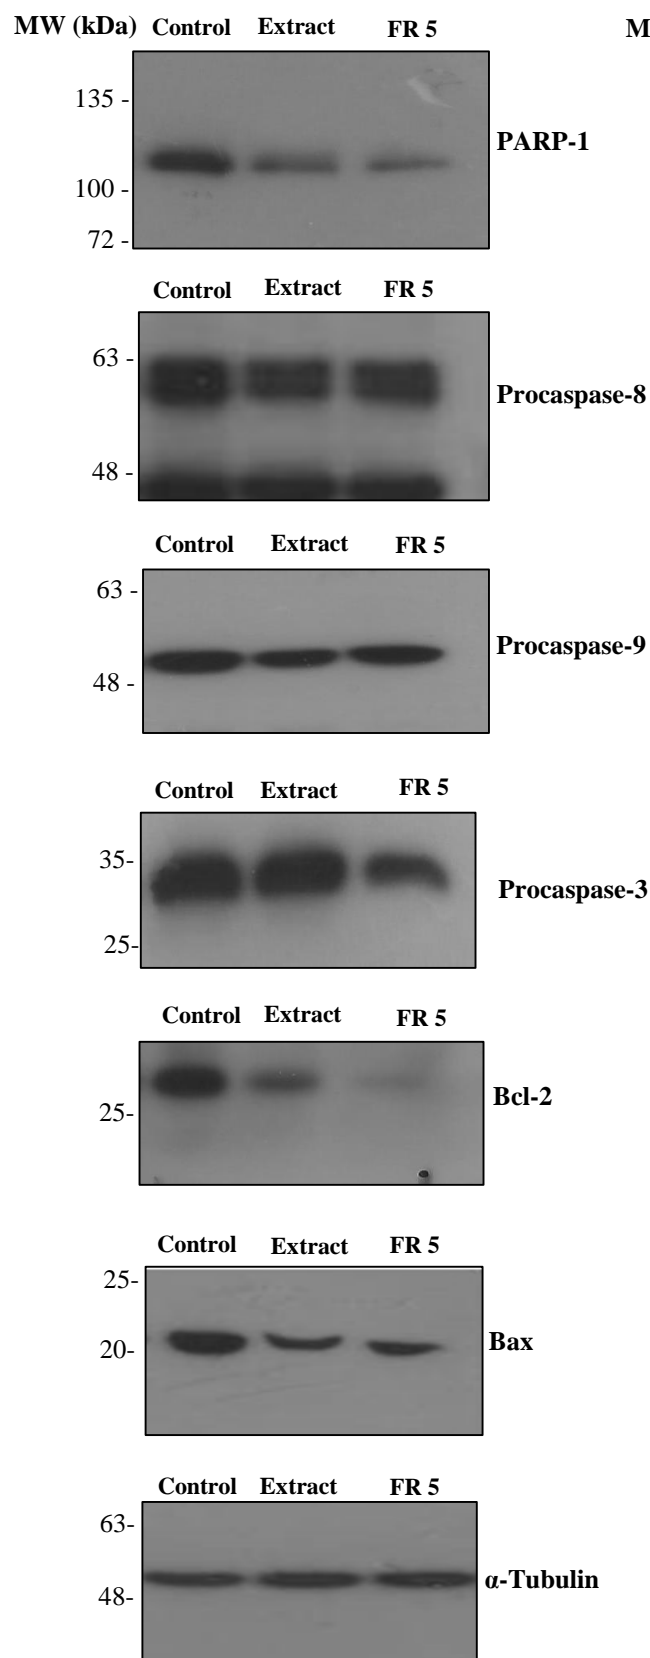**B**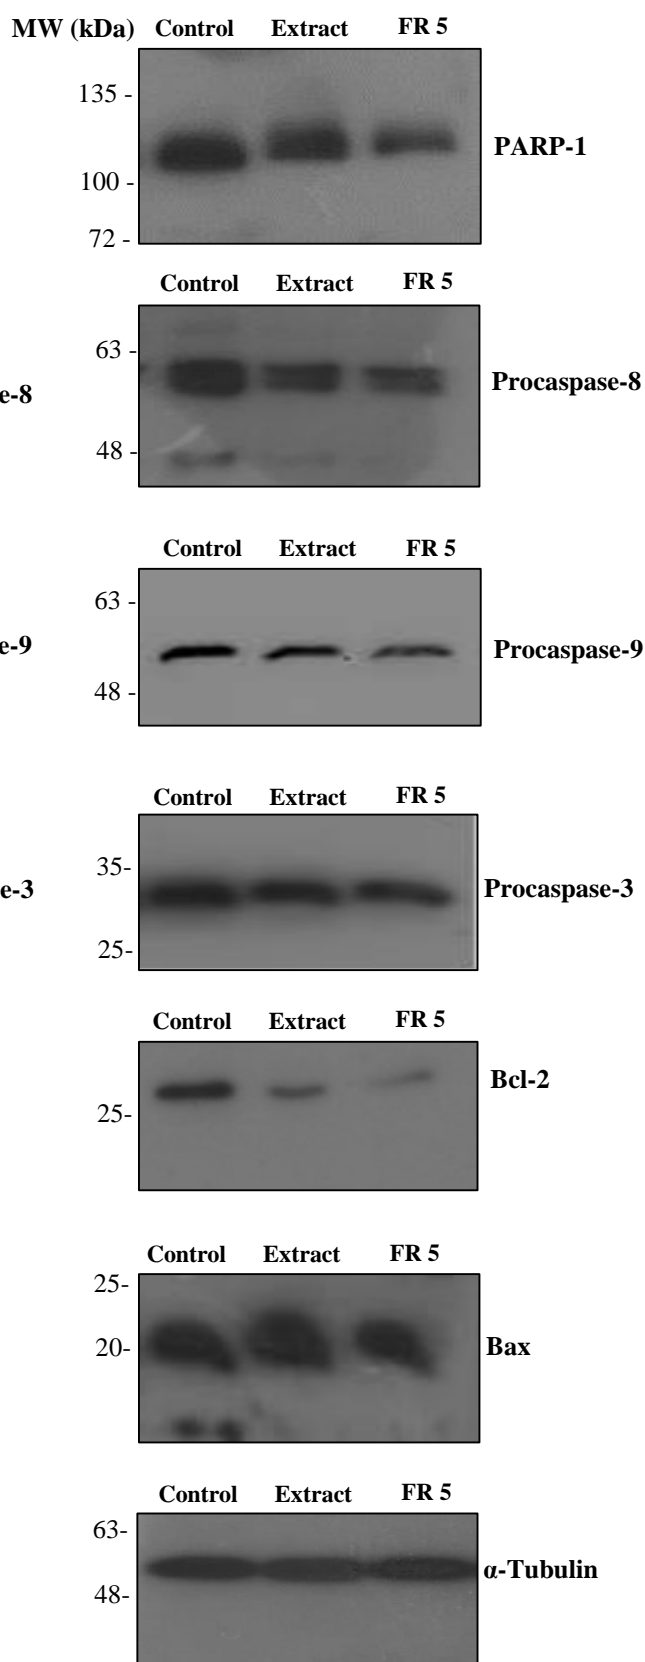

**Figure S2.** Effect of grape canes extract obtained at pH 7 for 60 min, and its polyphenol-rich FR 5 on apoptosis in Cal-33 (**A**) and JHU-SCC-011 (**B**) cells. The cropped blots are used in the main figure (Figure 7).
